# Supplementary material for: Replication Study for the Association Between Four Loci Identified by a Genome-Wide Association Study on European American Subjects With Type 1 Diabetes and Susceptibility to Diabetic Nephropathy in Japanese Subjects With Type 2 Diabetes
Source: PubMed Central journal article supplement — Diabetes. 2010 May 11;59(8):2075–9. doi: 10.2337/db10-0067 (PMC2911071; doi:10.2337/db10-0067), 2010-05-11

**Supplementary Table 1** Clinical characteristics of the subjects

|                          | Study 1          |            | Study 2          |               |
|--------------------------|------------------|------------|------------------|---------------|
|                          | Case proteinuria | control    | Case proteinuria | control       |
| Sex (M:F)                | 505:244†§        | 267:285‡   | 302 : 147§       | 555 : 410     |
| Age (year)               | 60.1 ± 0.4§      | 62.4 ± 0.5 | 64.7 ± 0.4       | 64.8 ± 0.3    |
| BMI (kg/m <sup>2</sup> ) | 23.7 ± 0.2       | 23.6 ± 0.2 | 23.5 ± 0.2       | 23.8 ± 0.1    |
| HbA1c (%)                | 7.6 ± 0.2        | 7.6 ± 0.1  | 8.0 ± 0.1        | 8.1 ± 0.1     |
| SBP (mmHg)               | 140 ± 1§         | 132 ± 1    | 141 ± 1§         | 134 ± 1       |
| DBP (mmHg)               | 76 ± 0.5§        | 74 ± 0.5   | 77 ± 0.5         | 77 ± 0.4      |
| Duration (year)          | 19.3 ± 0.4§      | 15.3 ± 0.4 | Not available    | Not available |

|                          | Study 3*                |            | Study 4      |             |
|--------------------------|-------------------------|------------|--------------|-------------|
|                          | Progression proteinuria | control    | case ESRD    | control     |
| Sex (M:F)                | 20:12                   | 110:58     | 199 : 101    | 149 : 69    |
| Age (year)               | 60.9 ± 1.7              | 60.4 ± 0.7 | 64.4 ± 0.6   | 65.0 ± 0.7  |
| BMI (kg/m <sup>2</sup> ) | 24.9 ± 0.5              | 23.9 ± 0.3 | 22.1 ± 0.2§  | 23.4 ± 0.3  |
| HbA1c (%)                | 7.7 ± 0.2               | 7.4 ± 0.1  | 6.12 ± 0.07§ | 6.80 ± 0.07 |
| SBP (mmHg)               | 138 ± 3                 | 137 ± 1    | 142 ± 1§     | 121 ± 1     |
| DBP (mmHg)               | 77 ± 2                  | 77 ± 1     | 73 ± 1§      | 69 ± 1      |
| Duration (year)          | 14.5 ± 1.6              | 12.8 ± 0.7 | 21.9 ± 0.9§  | 16.3 ± 0.4  |

Values are mean ± SE, NA: not available

\*Data at baseline are presented † information for 5 subjects are unknown ‡ information for 6 subjects are unknown

§P < 0.05 vs. control

**Supplementary Table 2** Genotype data of candidate SNPs in Japanese subjects with type 2 diabetes

| SNP (risk allele*)  |          | Nephropathy<br>(11/12/22) † | P for HWET‡ | Control<br>(11/12/22) † | P for HWET‡ |
|---------------------|----------|-----------------------------|-------------|-------------------------|-------------|
| rs39059 (A* > G)    | Study 1  | 220/325/146                 | 0.20        | 125/242/106             | 0.59        |
|                     | Study 2  | 137/226/126                 | 0.10        | 254/465/225             | 0.67        |
|                     | Study 3  | 16/10/5                     | 0.14        | 50/71/43                | 0.09        |
|                     | Study 4  | 84/154/51                   | 0.17        | 58/115/45               | 0.39        |
| rs39075 (G* > A)    | Study 1  | 223/335/154                 | 0.18        | 126/240/104             | 0.61        |
|                     | Study 2  | 140/228/114                 | 0.26        | 254/476/201             | 0.43        |
|                     | Study 3  | 16/9/5                      | 0.09        | 52/73/34                | 0.38        |
|                     | Study 4  | 90/158/49                   | 0.14        | 64/114/44               | 0.60        |
| rs1888747 (G* > C)  | Study 1  | 476/206/30                  | 0.20        | 300/153/19              | 0.93        |
|                     | Study 2  | 312/159/20                  | 0.96        | 603/308/35              | 0.57        |
|                     | Study 3  | 15/12/3                     | 0.79        | 116/43/8                | 0.14        |
|                     | Study 4  | 178/104/18                  | 0.59        | 146/68/9                | 0.76        |
| rs10868025 (A* > G) | Study 1  | 393/279/47                  | 0.79        | 255/203/31              | 0.26        |
|                     | Study 2  | 246/205/35                  | 0.38        | 507/366/70              | 0.72        |
|                     | Study 3  | 14/12/4                     | 0.58        | 93/56/16                | 0.09        |
|                     | Study 4  | 147/122/30                  | 0.53        | 115/93/14               | 0.40        |
| rs739401 (T > C*)   | Study 1  | 308/325/72                  | 0.31        | 221/202/49              | 0.78        |
|                     | Study 2  | 212/224/45                  | 0.20        | 431/383/115             | 0.04        |
|                     | Study 3  | 15/13/2                     | 0.71        | 63/75/26                | 0.64        |
|                     | Study 4  | 136/134/28                  | 0.54        | 99/98/24                | 0.97        |
| rs451041 (G > A*)   | Study 1  | 371/297/42                  | 0.08        | 280/172/29              | 0.71        |
|                     | Study 2  | 253/207/30                  | 0.15        | 526/333/81              | 0.01        |
|                     | Study 3  | 17/12/1                     | 0.52        | 79/68/16                | 0.81        |
|                     | Study 4  | 165/109/24                  | 0.32        | 118/83/17               | 0.65        |
| rs1041466 (A > G*)  | Study 1  | 551/149/2                   | 0.01        | 391/78/3                | 0.68        |
|                     | Study 2§ | 263/58/8                    | 0.03        | 593/131/10              | 0.37        |
|                     | Study 3  | 28/2/0                      | 0.85        | 138/28/1                | 0.74        |

|                    |         |             |      |             |      |
|--------------------|---------|-------------|------|-------------|------|
|                    | Study 4 | 233/58/6    | 0.30 | 173/43/5    | 0.25 |
| rs1411766 (G > A*) | Study 1 | 553/155/5   | 0.10 | 391/79/3    | 0.65 |
|                    | Study 2 | 369/109/10  | 0.56 | 756/185/12  | 0.86 |
|                    | Study 3 | 24/5/0      | 0.61 | 133/33/0    | 0.16 |
|                    | Study 4 | 221/66/11   | 0.04 | 172/50/2    | 0.43 |
| rs6492208 (C > T*) | Study 1 | 224/357/129 | 0.52 | 161/221/88  | 0.43 |
|                    | Study 2 | 158/238/90  | 0.98 | 301/465/182 | 0.92 |
|                    | Study 3 | 10/14/5     | 0.98 | 65/74/27    | 0.45 |
|                    | Study 4 | 95/140/65   | 0.32 | 81/97/46    | 0.09 |
| rs7989848 (G > A*) | Study 1 | 267/351/88  | 0.10 | 188/223/62  | 0.75 |
|                    | Study 2 | 189/224/72  | 0.67 | 358/447/132 | 0.69 |
|                    | Study 3 | 13/14/3     | 0.78 | 76/71/16    | 0.92 |
|                    | Study 4 | 111/138/51  | 0.47 | 99/91/33    | 0.12 |
| rs9521445 (C > A*) | Study 1 | 288/341/92  | 0.57 | 200/215/64  | 0.61 |
|                    | Study 2 | 194/222/73  | 0.47 | 373/442/128 | 0.87 |
|                    | Study 3 | 15/13/3     | 0.94 | 80/68/17    | 0.65 |
|                    | Study 4 | 113/135/50  | 0.37 | 101/86/32   | 0.06 |

\* Risk allele reported by Pezzolesi et al. †11; homozygous for major allele, 12; heterozygous, 22; homozygous for minor allele

‡ Hardy-Weinberg Equilibrium test, § DNA samples for 173 cases and 243 controls are not available.

Supplementary Figure 1. Pairwise linkage disequilibrium coefficients ( $r^2$ ) among 5 SNPs within Chromosome 13q locus (near IRS2) in JPT (A), or in CEU (B) from the HapMap database (HapMap: <http://www.hapmap.org/index.html>)

A

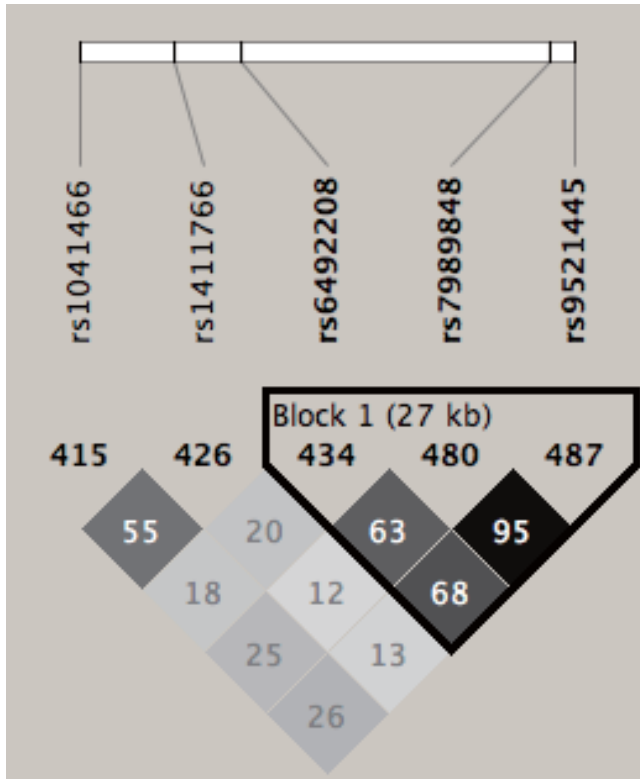

B

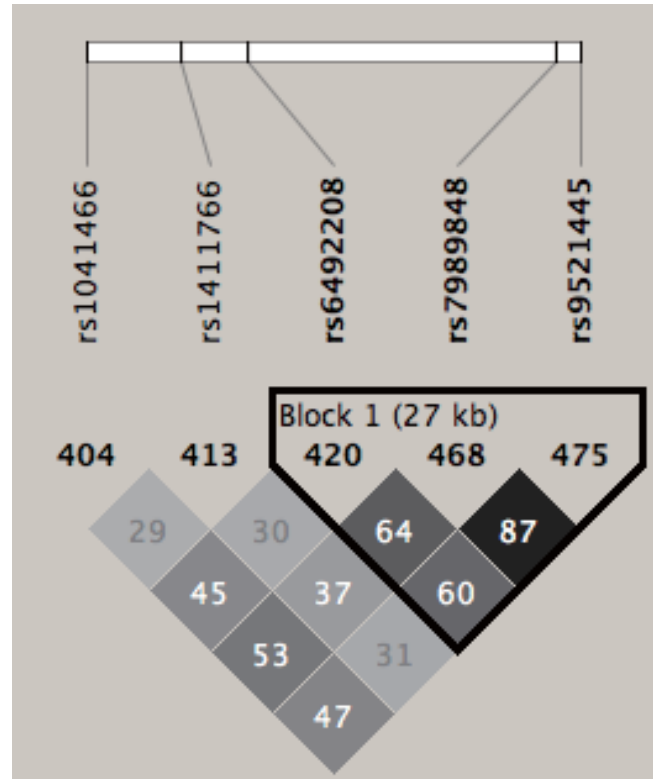

Supplement: supp_db10-0067_onlineappendix.pdf [file supp_db10-0067_onlineappendix.pdf]
